# Supplementary material for: Association of healthy lifestyle score with all-cause mortality and life expectancy: a city-wide prospective cohort study of cancer survivors
Source: PubMed Central journal article supplement (PMC8261938; doi:10.1186/s12916-021-02024-2), 2021-07-07
Supplement: 12916_2021_2024_MOESM1_ESM.pdf [file 12916_2021_2024_MOESM1_ESM.pdf]

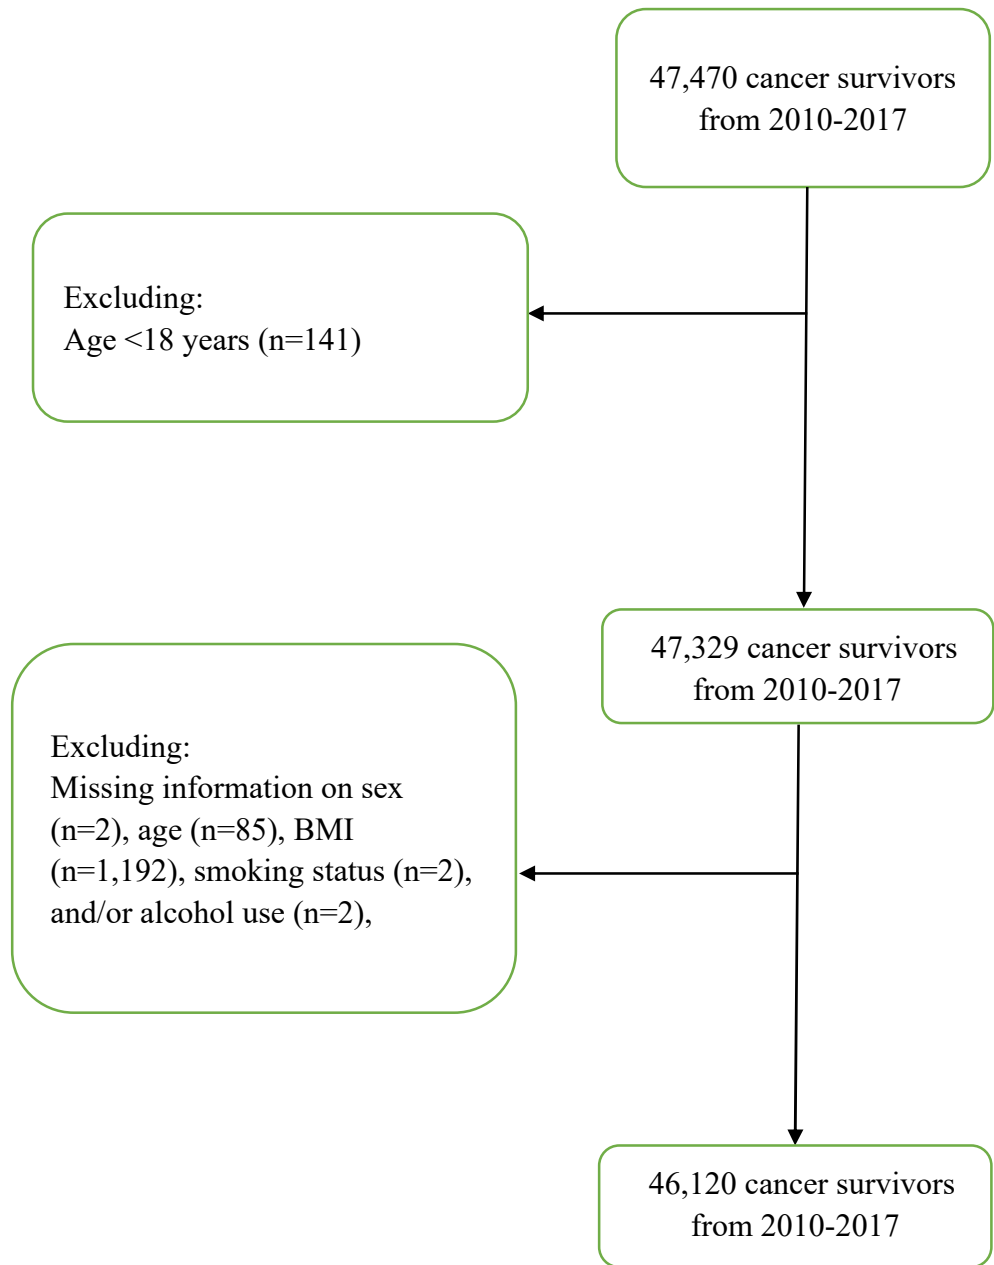

Figure S1 Study sample selection.
