# Supplementary material for: Association of healthy lifestyle score with all-cause mortality and life expectancy: a city-wide prospective cohort study of cancer survivors
Source: PubMed Central journal article supplement (PMC8261938; doi:10.1186/s12916-021-02024-2), 2021-07-07
Supplement: 12916_2021_2024_MOESM3_ESM.pdf [file 12916_2021_2024_MOESM3_ESM.pdf]

A

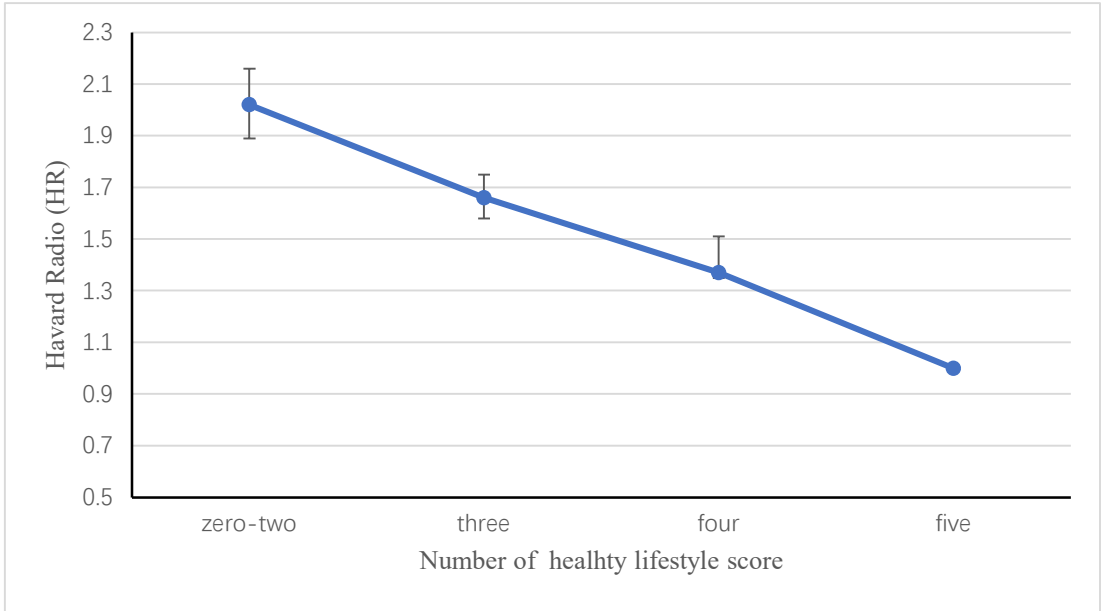

B

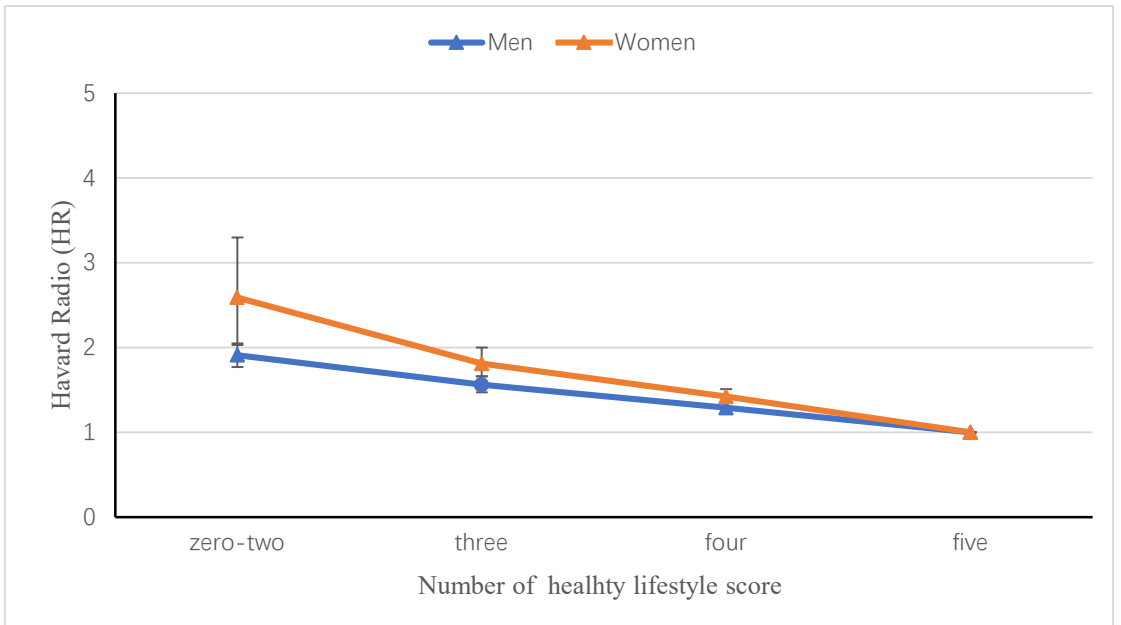

C

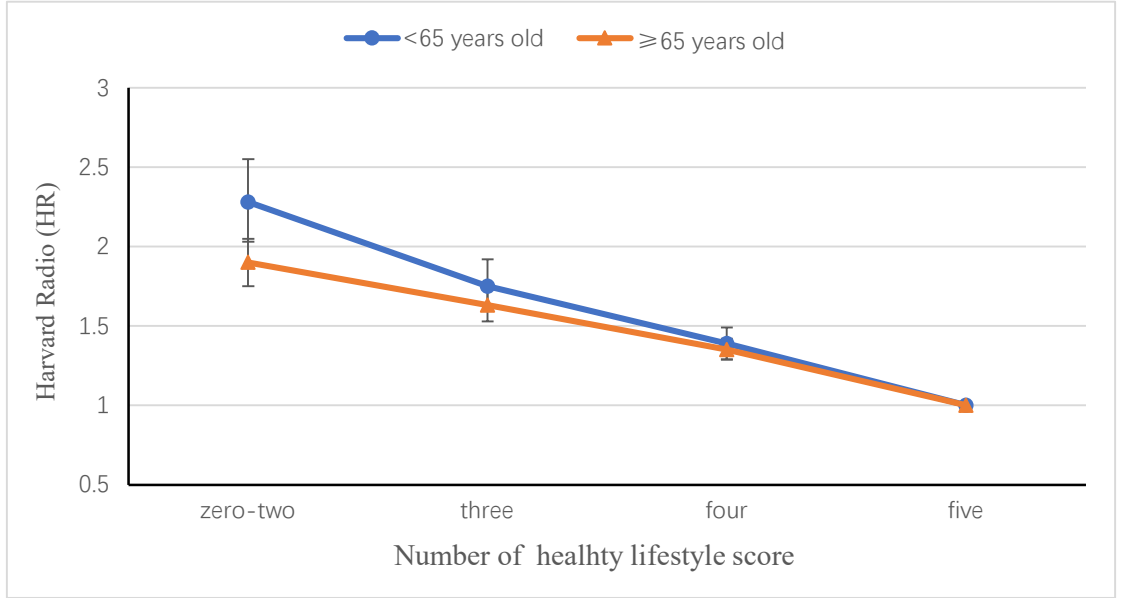

Figure S2 Estimation of mortality risks with or without interaction term in all cancer survivors. (A: without interaction term, B: with interaction term by sex, C: with interaction term by age)
