# Supplementary material for: Association of healthy lifestyle score with all-cause mortality and life expectancy: a city-wide prospective cohort study of cancer survivors
Source: Springer Nature journal article supplement (doi:10.1186/s12916-021-02024-2), 2021-07-07
Supplement: MOESM4 [file 19340126]

A

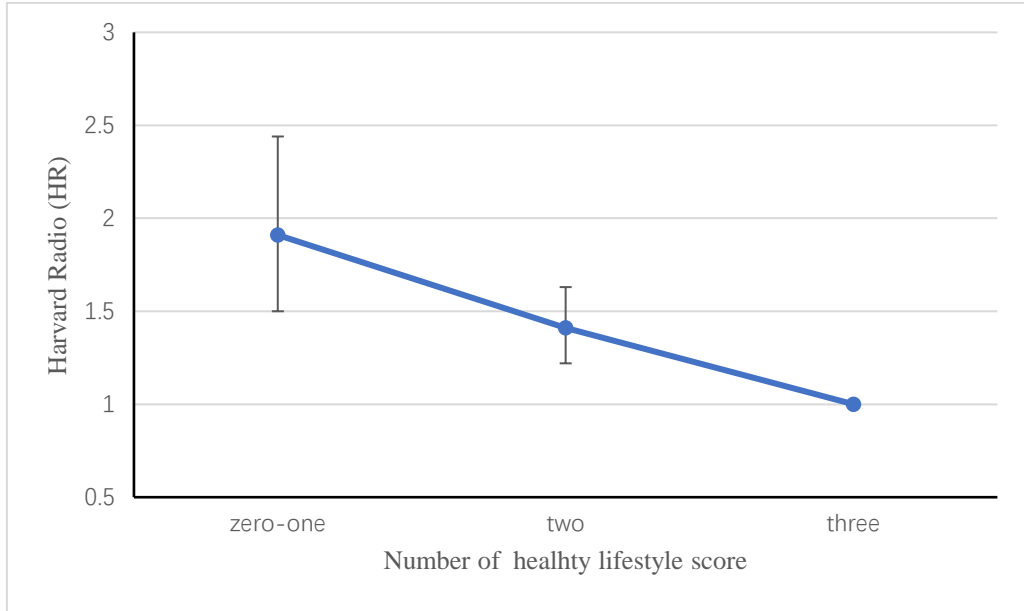

B

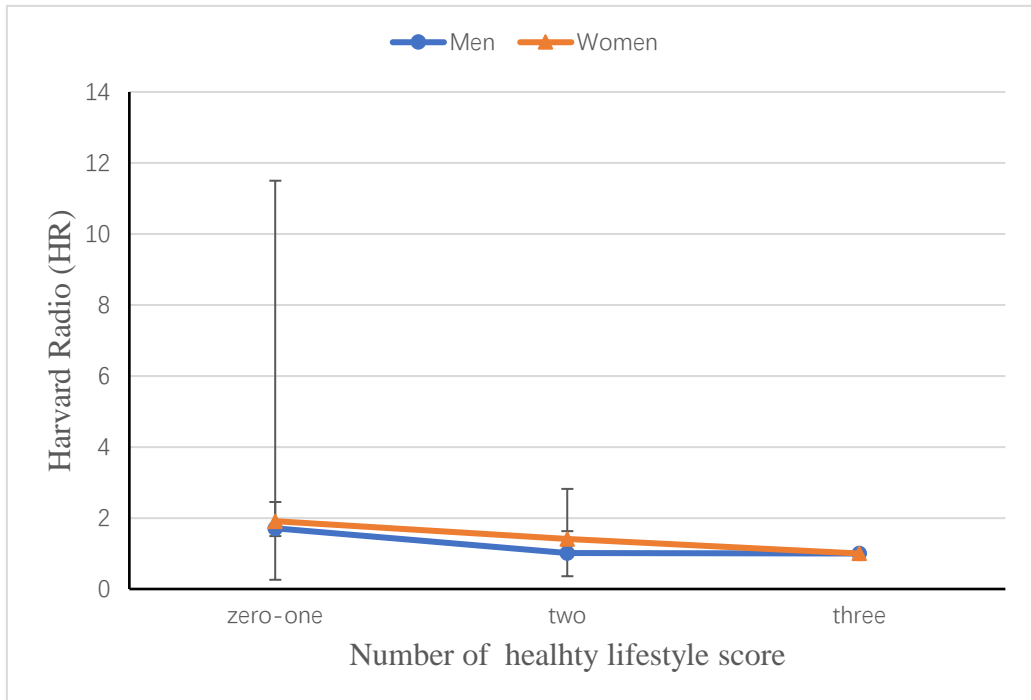

C

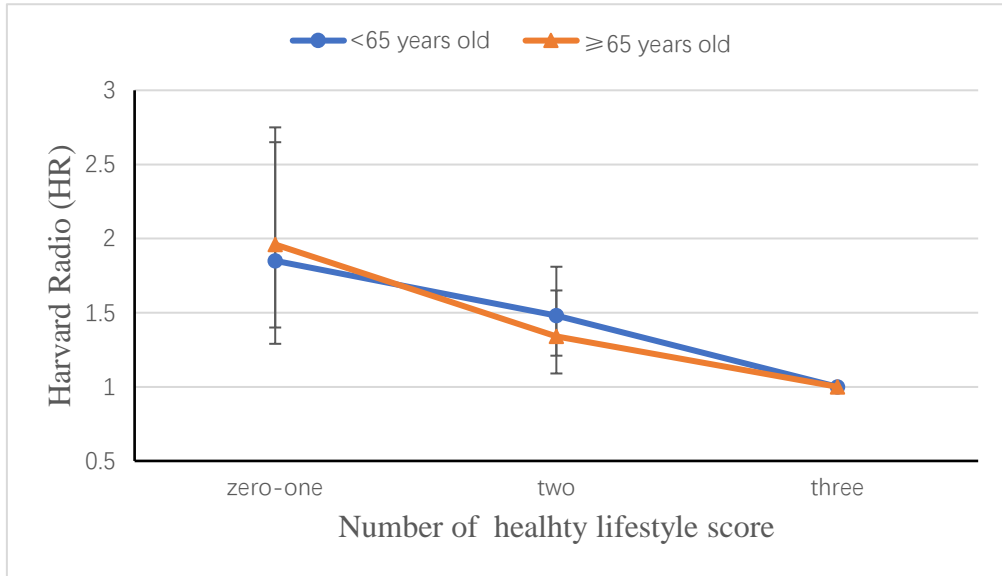

D

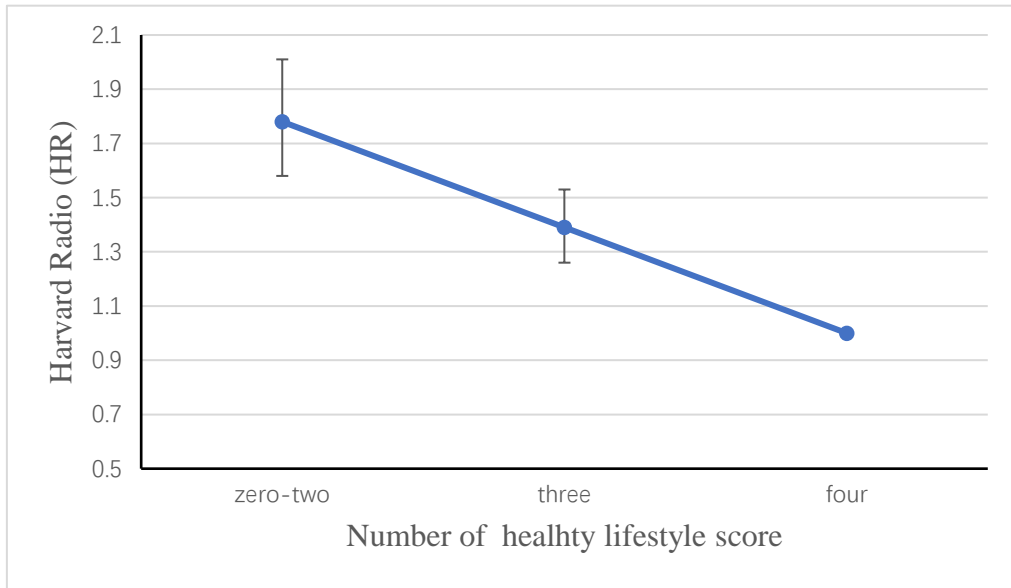

E

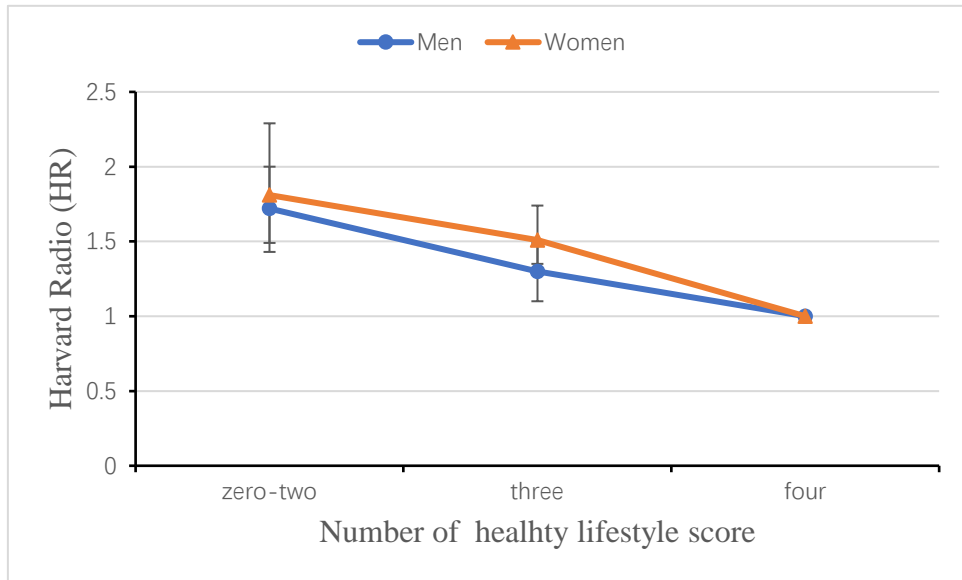

F

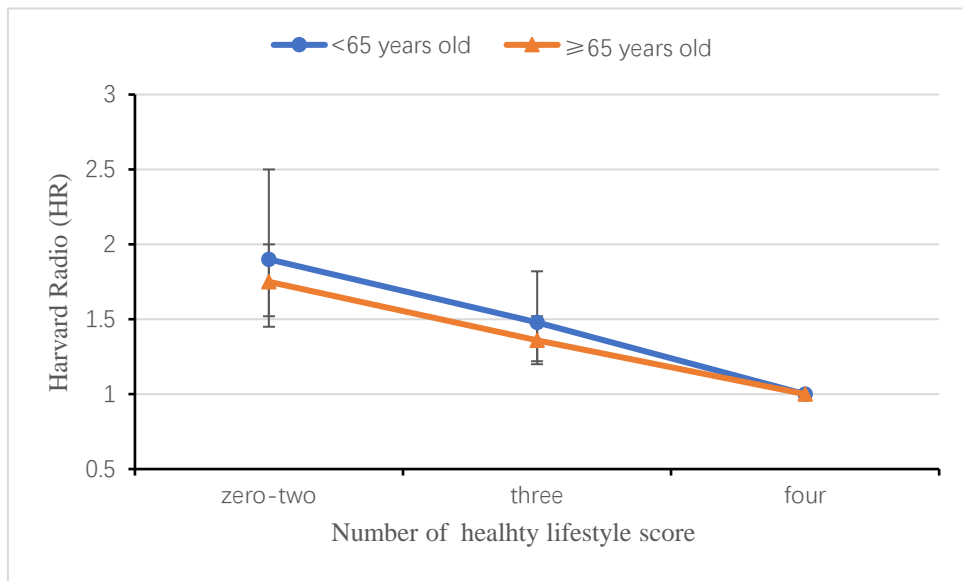

G

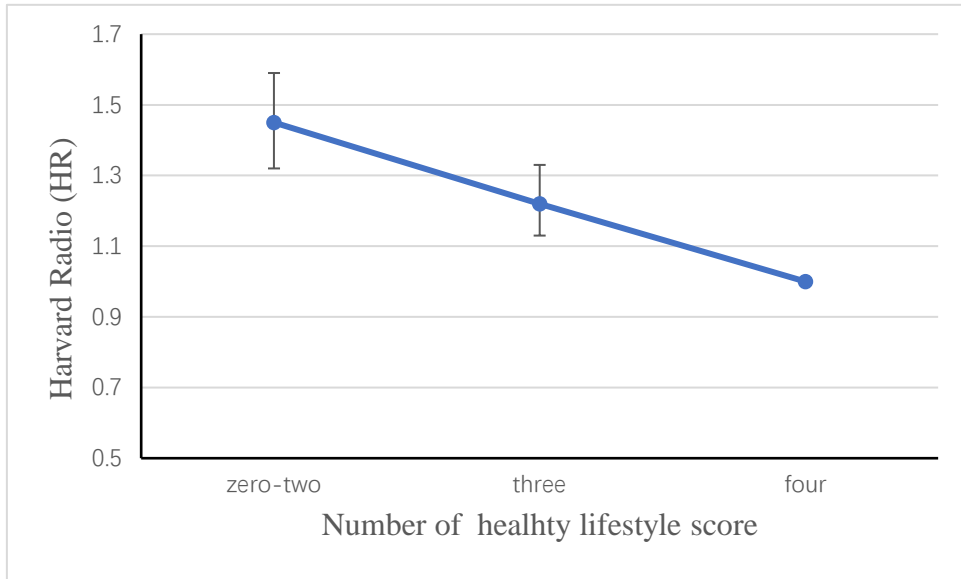

H

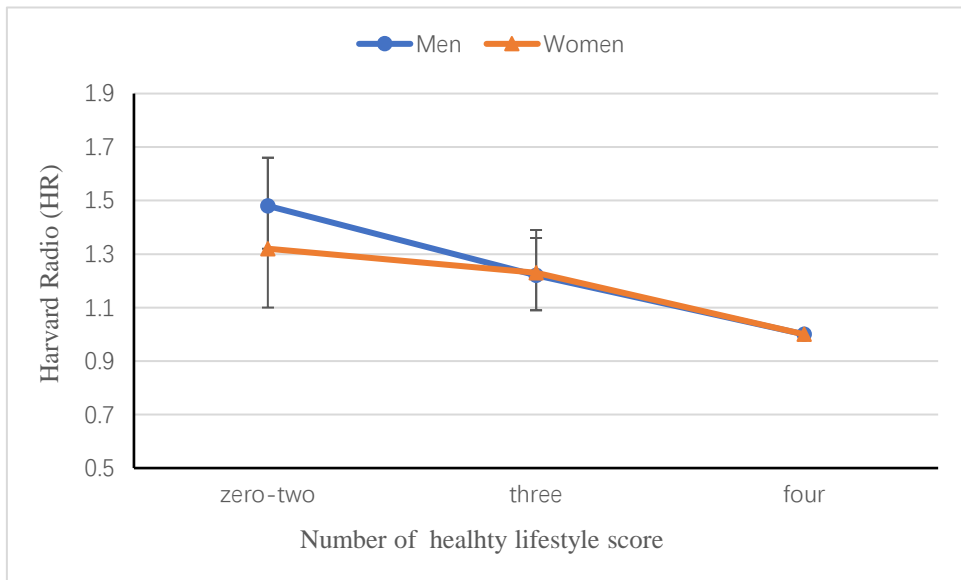

I

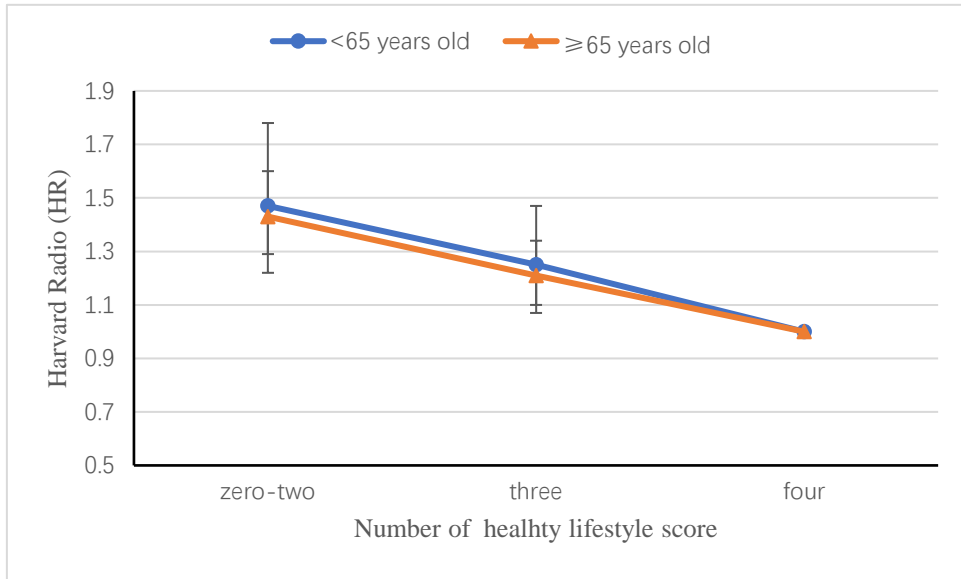

J

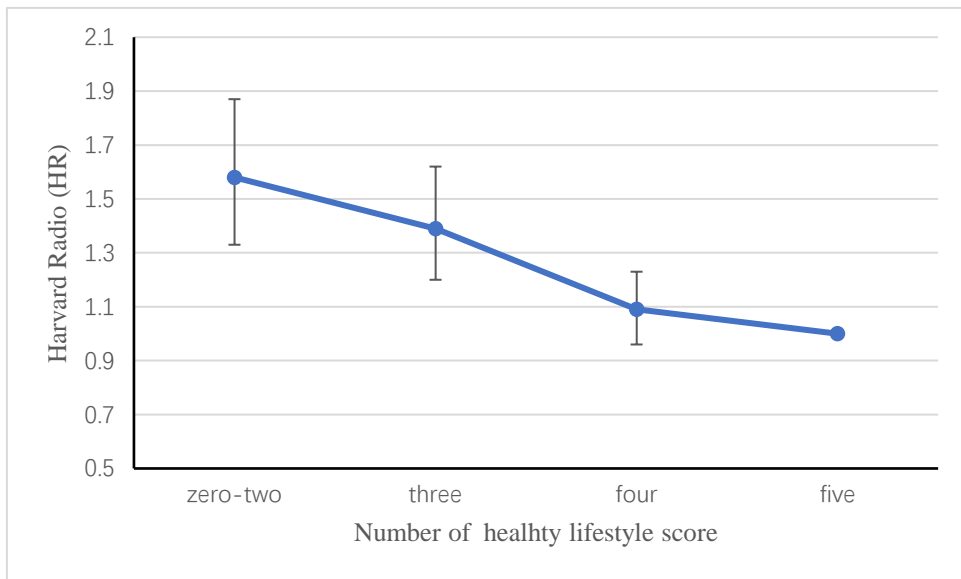

K

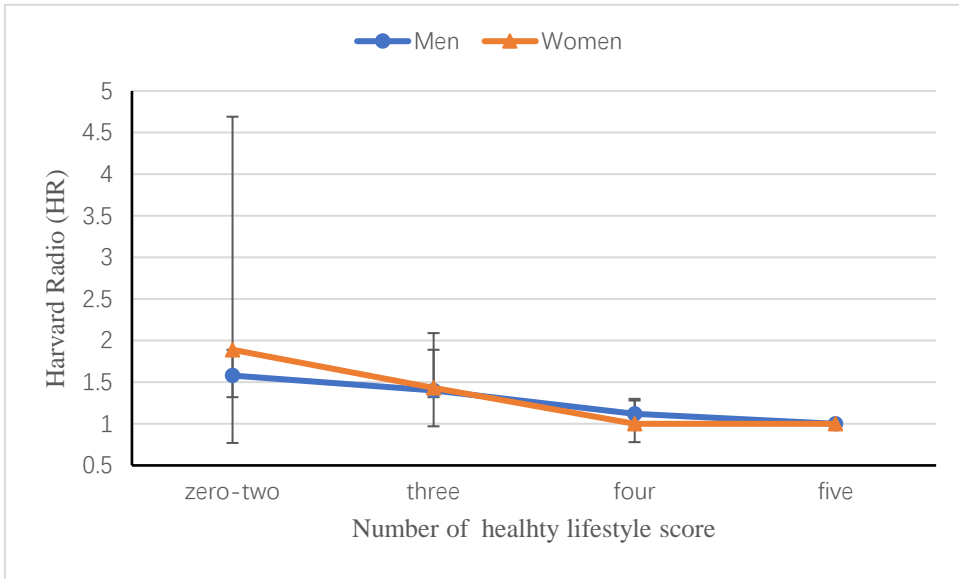

L

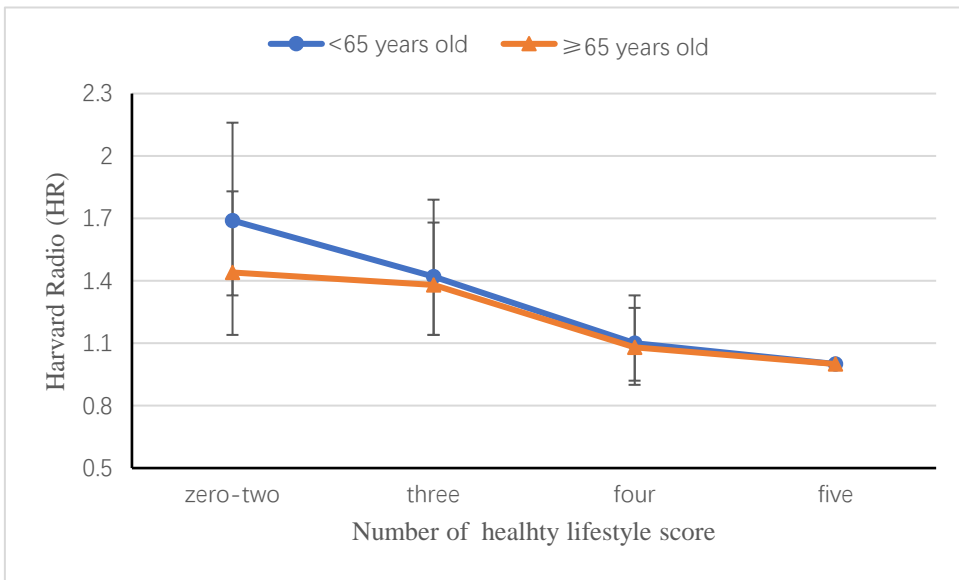

M

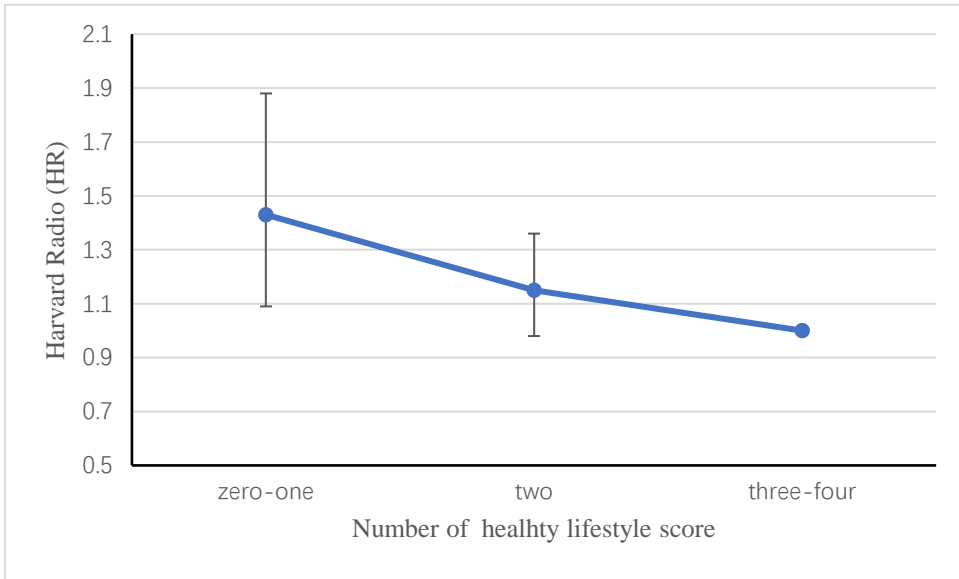

N

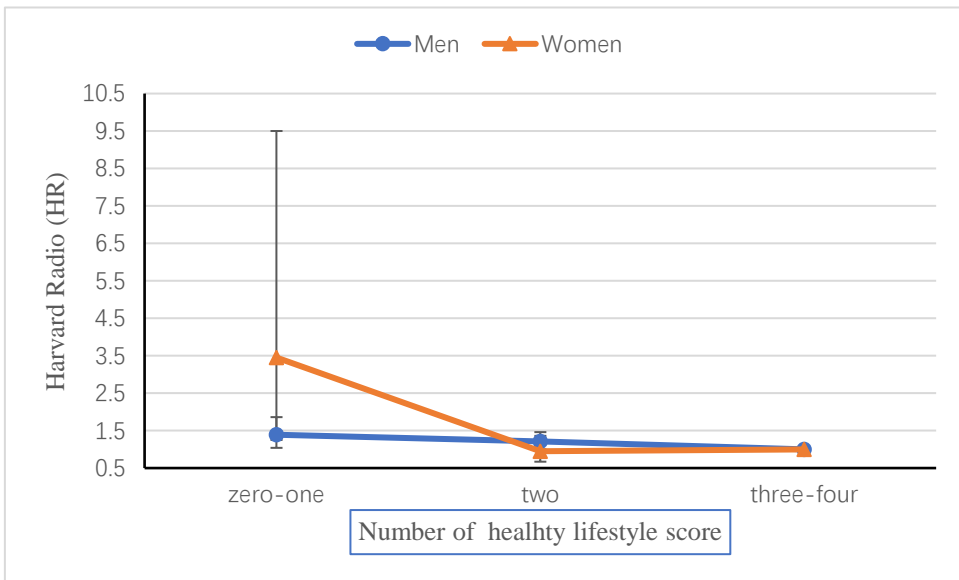

O

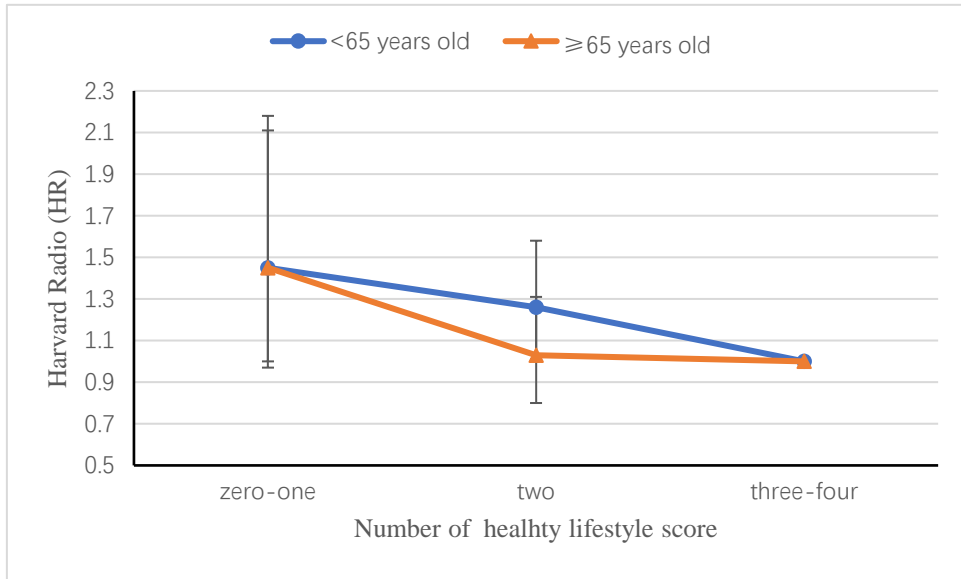

P

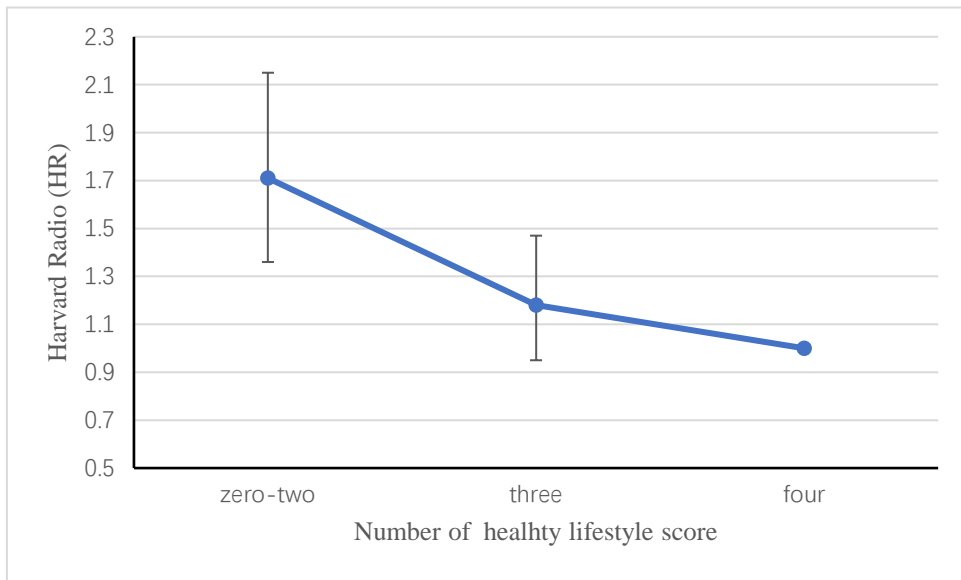



R

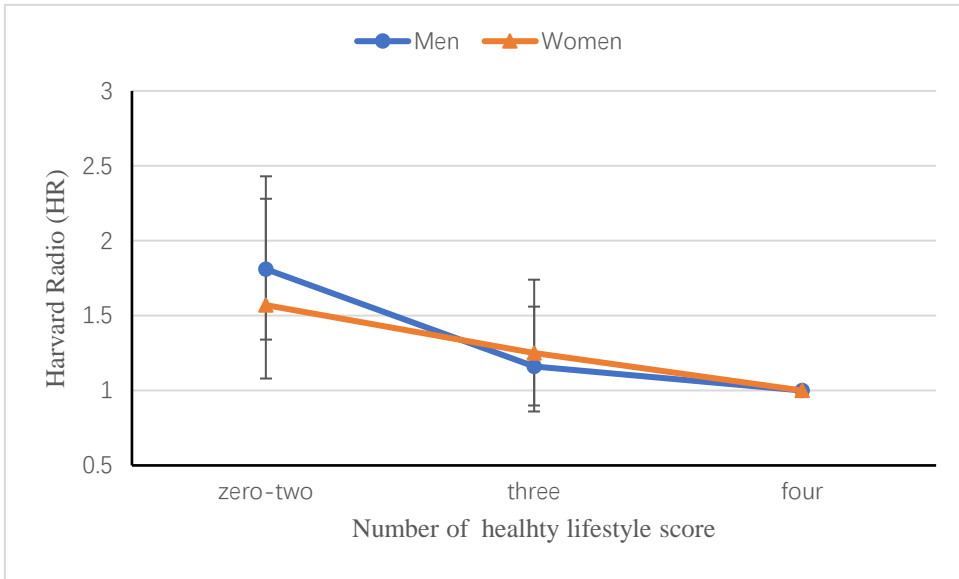

S

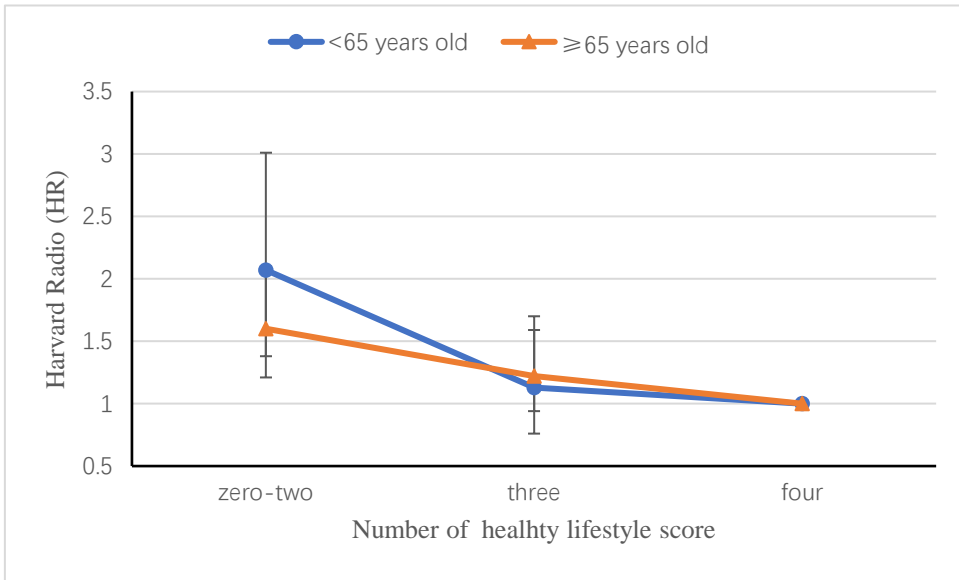

T

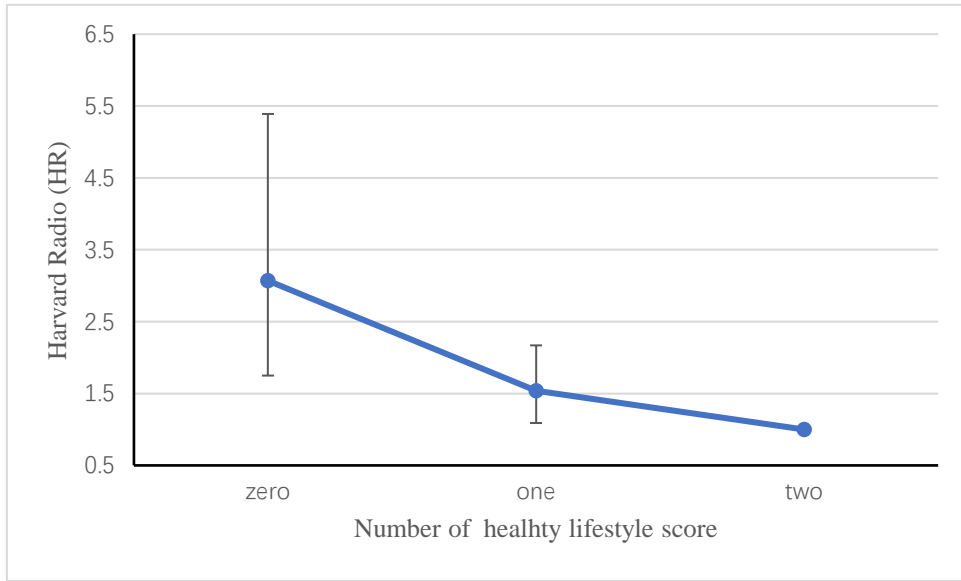

U

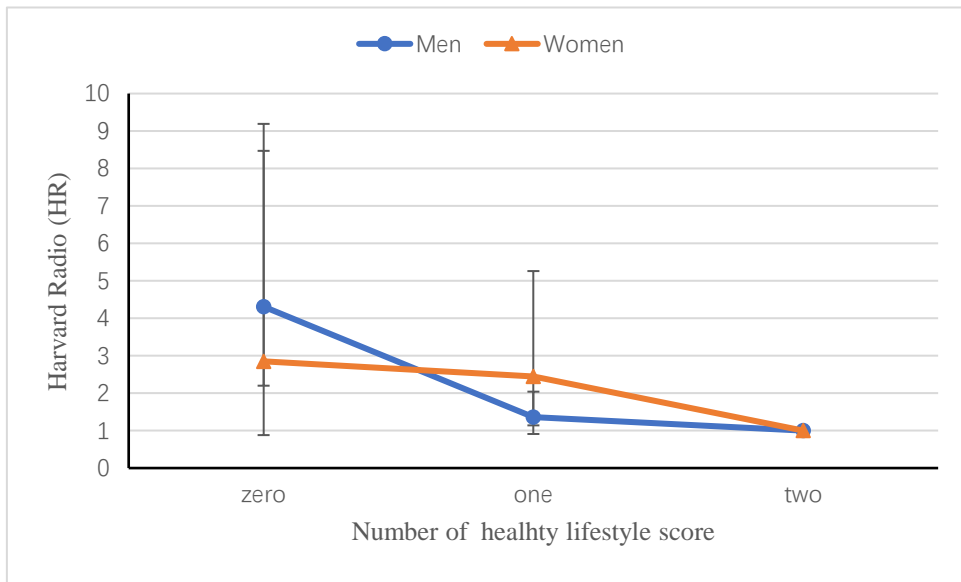

V

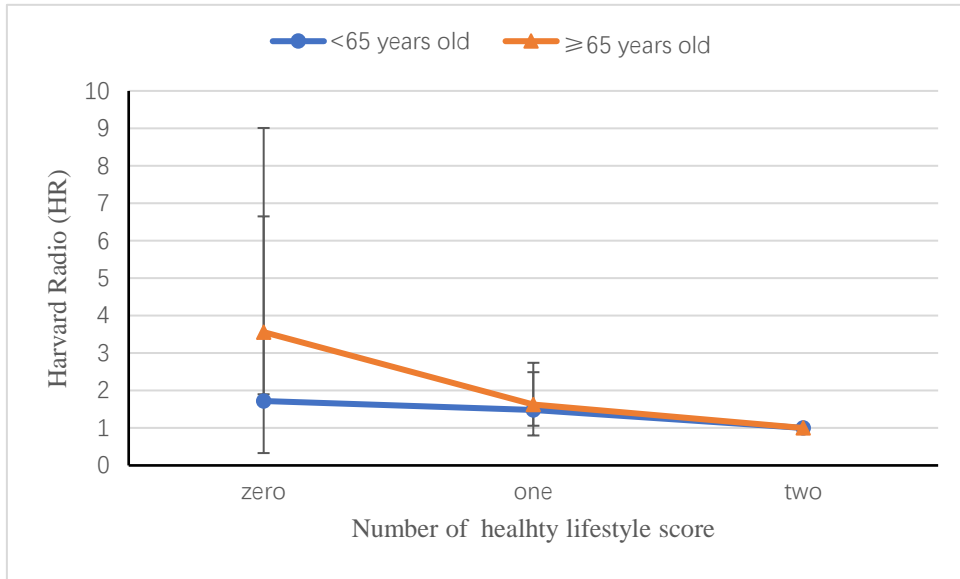

Figure S3 Estimation of mortality risks with or without interaction term in cancer-specific survivors. (A: without interaction term in breast cancer, B: with interaction term in breast cancer by sex, C: with interaction term in breast cancer by age, D: without interaction term in colorectal cancer, E: with interaction term in colorectal cancer by sex, F: with interaction term in colorectal cancer by age, G: without interaction term in lung cancer, H: with interaction term in lung cancer by sex, I: with interaction term in lung cancer by age, J: without interaction term in liver cancer, K: with interaction term in liver cancer by sex, L: with interaction term in liver cancer by age, M: without interaction term in nasopharynx cancer, N: with interaction term in nasopharynx cancer by sex, O: with interaction term in nasopharynx cancer by age, P: without interaction term in gastric cancer, Q: with interaction term in gastric cancer by sex, R: with interaction term in gastric cancer by age, S: with interaction term in nasopharynx cancer by age, T: without interaction term in kidney cancer, U: with interaction term in kidney cancer by sex, V: with interaction term in kidney cancer by age)
